Full title:

**Massive occurrence of benthic plastic debris at the abyssal seafloor beneath the Kuroshio Extension, the North West Pacific**

Short title:

Deep-sea plastic pollution off Japan

**Authors**

Ryota Nakajima<sup>1\*</sup>, Masashi Tsuchiya<sup>1</sup>, Akinori Yabuki<sup>1</sup>, Shuhei Masuda<sup>1</sup>, Tomo Kitahashi<sup>1</sup>, Yuriko Nagano<sup>1</sup>, Tetsuro Ikuta<sup>1</sup>, Noriyuki Isobe<sup>1</sup>, Haruhiko Nakata<sup>2</sup>, Heather Ritchie<sup>1</sup>, Kazumasa Oguri<sup>1</sup>, Satoshi Osafune<sup>1</sup>, Kiichiro Kawamura<sup>3</sup>, Maki Suzukawa<sup>3</sup>, Takuya Yamauchi<sup>2</sup>, Koichi Iijima<sup>1</sup>, Takao Yoshida<sup>1</sup>, Sanae Chiba<sup>1</sup>, Katsunori Fujikura<sup>1</sup>

**Affiliations**

<sup>1</sup> Japan Agency for Marine-Earth Science and Technology (JAMSTEC), 2-15 Natsushima, Yokosuka, Kanagawa 237-0061, Japan

<sup>2</sup> Faculty of Advanced Science and Technology, Kumamoto University, 2-39-1 Kurokami, Chuo-ku, Kumamoto 860-8555, Japan

<sup>3</sup> Graduate School of Science and Technology for Innovation, Yamaguchi University, 1677-1 Yoshida, Yamaguchi-city, Yamaguchi 753-8512, Japan

\* Corresponding author: Ryota Nakajima, nakajimar@jamstec.go.jp

**Abstract**

The deep-sea is considered to be an ultimate sink for marine plastic debris. The abyssal (3500-6500 m) covers the bulk of the deep ocean floor yet little is known about the extent of plastic debris on the abyssal seafloor. We undertook a quantitative assessment of debris presents on the abyssal seafloor (5700-5800 m depth) beneath the Kuroshio Extension current system in the Northwest Pacific, which is one of the major transit points for massive amounts of debris sourced from Asia that are entering the North Pacific Ocean. The dominant type of debris was single-use plastics- mainly bags and food packaging. The density of plastic debris (average 4561 items km<sup>-2</sup>) in the abyssal zone

was the highest recorded for an abyssal plain, suggesting that the deep-sea basin of the Northwest Pacific is a significant reservoir of plastic debris.

## MAIN TEXT

### Introduction

Plastic pollution is an issue emerging as one of the most serious threats to the ocean environment, including the deep-sea ecosystem. It has been estimated that more than ten million metric tons of plastic makes its way into the ocean each year and this figure is likely to rise <sup>1</sup>. Most plastics are believed to take several hundred years or even longer to break down completely <sup>2</sup> and, as a result, plastic debris continues to accumulate in the ocean.

Over time the abundance of plastic increases on the ocean surface, however the estimated standing stock of plastic debris has been shown to be <1% of the expected stock of plastics that ended up on the ocean surface <sup>3-5</sup>. Studies suggest there is a ‘loss’ of plastics as they move from the sea surface to the deeper ocean <sup>6</sup>, since buoyant plastic debris can sink when they become heavier than seawater as a result of biofouling and other factors <sup>7</sup>. As such, the deep seafloor has been recognized as a potential sink for plastic debris <sup>6,8,9</sup>. While the deep seafloor represents over 65% of the Earth’s surface <sup>10,11</sup> the occurrence of plastic debris on the deep seafloor has been investigated far less than coastal and surface waters. This is largely due to sampling difficulties, inaccessibility, and the high cost of sampling <sup>12-14</sup>. Furthermore very few studies have addressed plastic debris in the abyssal plain <sup>14</sup> that covers the bulk of the deep ocean floor <sup>15</sup>.

The potential for plastic debris to accumulate on the deep seafloor off Japan is of particular interest given that most of the plastic entering the ocean is coming from the Asian continent. China and Southeast Asia alone account for approximately half of the plastic that ends up in the ocean with China alone accounting for 28% of the total leakage <sup>1</sup>. The massive volumes of plastic debris leaked from East Asia and parts of Southeast Asia are transported north via the Kuroshio Current towards the Japanese archipelago (Fig. 1a). Indeed, the extent of plastic debris carried by the Kuroshio Current is evidenced by the surface microplastics off Southeastern Japan which showed a markedly higher density in samples taken from the main current of the Kuroshio than the adjacent waters <sup>16</sup>. As such, the surface waters around Japan have been recognized as a hotspot for microplastics <sup>17</sup>. The same may be true for the deep seafloor around Japan as the large

number of plastic debris transported by the Kuroshio current may be subsequently subducted and accumulated in the deep seafloor off the east coast of Japan. However, this hypothesis has not yet been confirmed experimentally.

It is unclear exactly how, and in what quantities, plastic debris carried by the Kuroshio current are transported to the deep seafloor but one possible mode of transport is the Kuroshio Extension (KE) current system (Fig. 1a, b). The Kuroshio Current enters the open basin of the North Pacific after separating from the coast of Japan around 35°N, 140°E where it is renamed the KE and travels eastward between 140°-180°E. The KE current system is known as one of the major transit points of plastic debris sourced from Asia to the North Pacific Subtropical Gyre - the notorious “Great Pacific Garbage Patch”<sup>18</sup>. The KE is one of the most dynamic regions in the North Pacific with rich meso- and submesoscale eddies<sup>19</sup>. The KE recirculation gyre (KERG) is located south of the KE, and its intensity and location is modulated by eddy interactions<sup>20</sup>. Eddies can increase the accumulation of microplastics and this is especially pertinent in anticyclonic eddies with their inward surface flow<sup>21,22</sup>. As such, the KERG may function to accumulate and retain marine debris in the Northwest Pacific Ocean forming the Western Pacific Garbage Patch<sup>17</sup>. As the living-time of quasi-stable gyres or standing eddies get longer, the debris might have a higher chance of being brought down into the subsurface layer as a result of biofouling in the surface water leading to loss of buoyancy<sup>6</sup>. If so, the abyssal plain in the open basin of the Northwest Pacific could represent a significant reservoir of the plastics carried by the Kuroshio current from East Asia.

Here we present the study of macroplastic debris on the abyssal seafloor beneath the KE and KERG, situated off the coast of Japan (Fig 1c, 5700-5800 m). We hypothesize that the abyssal plain seafloor beneath the KE and KERG constitutes a significant plastic reservoir and possesses a higher concentration of benthic debris than other abyssal plain. This study will allow us to assess the fate of the marine debris leaked from East Asia, which are then transported via the Kuroshio current, and determine if they have been accumulating on the deep seafloor off the east coast of Japan. This will significantly contribute to our understanding of the fate of ocean plastics.

## Results

### Debris densities and composition

Debris was found at all sites on the seafloor under the KE and KERG (5700-5800 m depth), some 500 km away from the land (Fig. 2a). The highest density of debris was found in the southern region of the KERG (St. 8) (7021 items/km<sup>2</sup>), followed by the KE (St. 10) (4834 items/km<sup>2</sup>) and the northern of the KERG (2149 items/km<sup>2</sup>). The overall mean density of debris in the KE and KERG was  $4,83 \pm 2,114$  items/km<sup>2</sup>. In contrast, no debris was observed during the observation in Myojin Knoll (St. 6.5) on the Izu-Ogasawara ridge, just below the main current of Kuroshio (1500 m depth).

The majority of items that could be identified as debris from video observations in the KE/KEG were composed of plastic, of which single-use plastic contributed 77.8-96.4% (Fig. 2a). Plastic was the only debris found at the southern region of the KERG (St. 8), while the proportion of plastic debris was 76.9% (2149 items/km<sup>2</sup>) and 93.3% (4512 items/km<sup>2</sup>) at St. 9 and 10, respectively. The overall mean density of macroplastic debris in the KE/KERG was  $4561 \pm 2436$  items/km<sup>2</sup> (Fig. 2a).

The debris density at Sagami Bay (St. 2) (1400 m depth), a bay close to a highly populated area of mainland Japan, was lower than the sites in KE and KERG, with 2730 items/km<sup>2</sup> of which plastic constituted 71.4% (1950 items/km<sup>2</sup>) (Fig 2a).

# Plastic debris composition

Plastic debris found at KERG and KE consisted mostly of fragments of plastic bags, and other films and packages. Among the debris retrieved during the surveys, polyethylene was the major polymer type of the plastic debris at KERG, comprising 50-80% of the plastic debris (Figs. 2b and 3, supplementary information Table S1). Clothes were collected at KERG (St. 8 and 9) where the clothing at St. 8 was entangled by a ribbon of net (Fig. 3c). The material of both the clothes were polyethylene terephthalate. An aluminum foil balloon debris was found at KERG (St. 9) where the foil had decomposed and the inner plastic film was bared (Fig. 3f). This is the deepest record of balloon debris (5800 m) found on the deep seafloor. Although the balloon debris was collected from the sea floor it was unfortunately lost during ascension to the sea surface. No fishing gear was observed during the dives, except for a small ribbon of net found at St. 8. Packaging for chicken hamburger steaks was collected at KE (St. 10) with a packaging date of September 1984, dating this item at over 35 years old at time of collection, yet the packaging was visually intact (Fig. 3g, h). The toothpaste tube collected at St. 10 was

144 14-15 years old at time of collection, according to the manufacture (Lion Corporation)  
145 which was determined by the packaging design (Fig. 3i).

146

147 Simulated behavior of debris

148

149 According to our particle tracking simulation, debris that started settling in the surface  
150 waters at the KE (St. 10), KERG (St. 8), and Myojin Knoll (St. 6.5) could be vertically  
151 transported to the seafloor by dominant buoyancy forcing them straight towards the  
152 bottom of the water column with an assumed sinking speed of  $1.32 \times 10^{-2}$  m/s from the  
153 laboratory experiment (Fig. 4a-f). Under this assumption, all particles were shown to  
154 reach the seafloor within 7 days, even to 6,000 m water depth. Therefore, is it likely that  
155 the behavior of sinking particles was not affected by subsurface ocean properties. This  
156 includes the subsurface current velocity which is highly variable over both spatial and  
157 temporal scales.

158

159 The model simulation also investigated whether bottom currents could move the debris  
160 after they reached the seafloor therefore widening the range of debris distribution. It was  
161 shown that after 5 years the distribution of the particles initially located at the surface of  
162 St. 8 and 10 tended to move north-eastward with relatively higher abundance found along  
163  $145^{\circ}\text{E}$  (Fig. 4g, h). In contrast, all the particles initially located at the surface of St. 6.5 at  
164 Myojin Knoll moved towards the eastern region, some of which were found along  $145^{\circ}\text{E}$ ,  
165 but no particles remained around the original settling point after 5 years (Fig. 4i).

166

## 167 Discussion

168 This study highlights a massive occurrence of benthic debris in the deep-sea basin of the  
169 Northwest Pacific. The fate of plastics in the Western Pacific is of particular interest as  
170 China and other Southeast Asian countries account for approximately half of the plastic  
171 that end up in the ocean<sup>1</sup>. The massive volume of plastic debris leaked from East Asia,  
172 and parts of South East Asia, is transported by the Kuroshio and Kuroshio Extension  
173 (KE) currents to the North Pacific Ocean<sup>23</sup>. The KE current system is one of the major  
174 transit points of debris sourced from the Asian continent that enters the North Pacific.  
175 Considering that the vast amount of floating plastic debris in the open ocean is likely a  
176 small fraction of the total amount of plastics that end up in the ocean<sup>3</sup>, the seafloor under  
177 the KE system may be a significant reservoir of plastic originating from the Asian  
178 continent including Japan. Therefore, we surveyed the seafloor below the KE and its

179 recirculation gyre (KERG) in order to examine the extent of the benthic plastic debris  
180 carried by Kuroshio current.

181

182 Previous investigations examining deep-sea debris have revealed that plastics are widely  
183 distributed, and their abundance and occurrence at the seafloor are highly variable <sup>24</sup>.

184 Higher abundances of debris in the deep seafloor have been shown in locations proximal  
185 to highly populated areas, areas of high fishing activities, submarine canyons on the  
186 continental slope, and trenches <sup>5</sup>. In contrast, continental shelves and ocean ridges have  
187 reported the lowest densities <sup>12</sup>. Remote areas with a depth over 4000 m have also shown  
188 far lower abundances of benthic plastic than in areas that are shallower and closer to the  
189 coastline <sup>14,25</sup>. However, the density of benthic plastic we found on the seafloor of the KE  
190 system was the highest value yet recorded from an abyssal plain seafloor (Fig. 5).

191

192 Although comparisons between areas can reflect differences in sampling methodologies,  
193 the density of plastic debris on the seafloor below the KE/KERG (average 4561  
194 items/km<sup>2</sup>) was higher than the world average of submarine canyons (2804 items km<sup>-2</sup>),  
195 seamounts, banks and mounds (382 items/km<sup>2</sup>), trenches (1720 items/km<sup>2</sup>), shelves (664  
196 items/km<sup>2</sup>), and ridges (339 items/km<sup>2</sup>) (Fig. 5, see also Table S2). Notably, the  
197 macroplastic density below the KE/KERG (abyssal plain) was two orders of magnitude  
198 higher than the world average for abyssal plains (88 items/km<sup>2</sup>).

199

200 Notwithstanding, the density on the seafloor below the KE/KERG is not the highest  
201 recorded density of macroplastic debris in the marine environment which is known to be  
202 the most abundant in submarine canyons and trenches <sup>13</sup>. The macroplastic density at  
203 KERG was lower than the Campania coast (30-300 m) in the Mediterranean Sea, which  
204 recorded the highest density of benthic plastic debris including fishing gear (>100000  
205 items/km<sup>2</sup>)<sup>26</sup> and the La Fonera canyon and Sardinian slope also in the Mediterranean Sea  
206 (14319 items km<sup>-2</sup> and 14300 items/km<sup>2</sup>, respectively)<sup>13,27</sup>, but was comparable to, or  
207 higher than, other canyons in the Mediterranean Sea <sup>13,28</sup> and off the coast of Portugal <sup>29</sup>  
208 (see also Table S2). The macroplastic density at KERG was also comparable to those  
209 found in the central California (6555 items/km<sup>2</sup>)<sup>30</sup> and the Ryukyu Trench, Pacific Ocean  
210 (ca. 3350 items/km<sup>2</sup>)<sup>31</sup>, and those found in HAUSGARTEN, Arctic (<3000 items/km<sup>2</sup>) <sup>32</sup>.

211

212 The density of debris below the KE/KERG was also comparatively higher than other  
213 areas in proximity to Japan. The macroplastic density below the KE/KERG (average  
214 4561 items /km<sup>2</sup>) was higher than that found in the deep-basin off northern Japan (335

215 items/km<sup>2</sup>) with a depth of 6000 m, that experiences no effect of the Kuroshio current <sup>14</sup>.  
 216 It was also 2-3 fold higher than the debris density reported for Sagami Bay, which was  
 217 unexpected as Sagami Bay is located off the coast of a highly populated area that includes  
 218 Tokyo (see Fig. 1c).

219  
 220 Considering the high proportion of single-use plastics, the debris found in the KE/KERG  
 221 are likely of land-based origin. The negligible presence of fishing gear-like debris in this  
 222 region is likely an indication of low fishing activity. Thus, we can infer that the majority  
 223 of the debris observed in the KERG region originated from terrestrial sources. We also  
 224 observed four large wooden pieces of debris (both natural and processed) at KE/KERG  
 225 which further supports the hypothesis of the debris originating from a land-based source.  
 226

227 One of the pieces of debris (food packaging) retrieved at the KE seafloor was largely  
 228 intact with clear printing on the package that dated it as 35 years old at the time of  
 229 collection. This is an interesting example of the persistence of plastic debris in the marine  
 230 environment. UV radiation and thermal oxidation are the primary factors that contribute  
 231 to the degradation of plastics <sup>33</sup> but these two factors are completely missing in the  
 232 deep-sea environment thus the plastic debris on the deep seafloor will most likely persist  
 233 for at least a century.

234  
 235 Previous studies showed that the density of man-made debris on the deep seafloor, far  
 236 from the coast, is lower than that of the seafloor adjacent to populated areas <sup>14,29</sup>. As such,  
 237 land-based debris density tends to decrease with increasing distance from the coast, and  
 238 has not been considered to transport in large quantities more than a few tens of kilometers  
 239 from their source <sup>27,29</sup>. Yet, our sampling sites at KE/KERG were ca. 500 km away from  
 240 the nearest landmass but the density of land-based debris at KERG was higher than that of  
 241 Sagami Bay, located near a highly populated area in proximity to Tokyo. This challenges  
 242 the assertion that terrestrial debris does not get transported to remote deep ocean  
 243 seafloors.

244  
 245 The strong Kuroshio current must be the major pathway transporting debris from  
 246 land-based sources to open waters but it is unclear how debris are transported to the  
 247 offshore deep seafloor. The distribution of deep-sea debris is influenced by a combination  
 248 of factors such as bathymetry, surface and/or bottom currents, material buoyancy and  
 249 human activity <sup>34</sup>. Our simulation model indicated that the surface debris carried by the  
 250 Kuroshio current could be vertically transported to the seafloor, even to abyssal depths.



Our model also showed that the debris that reached the bottom at St. 6.5 (1500 m depth) had been swept away by the strong Kuroshio current, in an easterly direction over after several years, and would not remain on the bottom where they initially settled. This result is in broad agreement with the observation that no debris were found at St. 6.5. It is important to note that the seafloor below St. 6.5, Myojin Knoll, is located on the Izu-Ogasawara ridge along 139°E (Fig. 1). Due to the presence of the ridge, which might act as a barrier between the west and east of 139°E, the debris sunken at the western region of 139°E may not reach to the seafloor east of 139°E. The debris sunken at the KE/KERG (St. 8 and 10) were observed at the bottom along 145°E and our simulation model suggested they were also somewhat dispersed to the east over several years. If we consider the simulated results together with the observations of high debris density beneath the KE/KERG, it is likely that the debris found on the seafloor below the KE/KERG entered from the surface water between 139°E and 145°E on the Kuroshio and the KE/KERG current system.

The KE system is characterized by the highest eddy kinetic energy level in the Pacific Ocean and features both anticyclonic and cyclonic eddies. Brach reported that anticyclonic eddies function to accumulate microplastics and this may be the case in the KE/KERG region where a relatively large number of floating debris accumulate in the quasi-stable gyre or standing eddies<sup>22</sup>. Although there have not been any observation-based studies on the floating plastics it is considered that the plastic debris transported by the Kuroshio current is subsequently trapped and accumulated in the large-scale recirculation gyre south of the Kuroshio extension, and/or in the eddies along the KE current<sup>23</sup>. As the living-time of quasi-stable gyre or standing eddies gets longer, the debris may have a higher chance of being brought down into the subsurface layer due to biofouling in the surface water leading to a loss of buoyancy. This highlights the need for further studies to investigate the transportation of surface pollutants to the deep seafloor in the open ocean which is an important step into elucidating possible hotspots of debris on the deep seafloor.

It is important to note that while only three sites in the KE/KERG were analyzed in this study we believe that these sites adequately cover the significance of the debris density on the deep seafloor below the KE system, as evidenced by the highest benthic density being recorded below the KE/KERG. The KE system expands between 28°-36°N and 140°-160°E<sup>35</sup>, with a total area of ca. 1,420,000 km<sup>2</sup>. Assuming the KE system, as a whole, contributes to the subduction of debris into the deep ocean and the debris are



distributed uniformly on the seafloor, the number of macroplastic debris on the seafloor under the KE system could be as high as 7.5 billion items, weighing 75,000 metric tons based on estimations using the average weight of plastics retrieved in this study (Table S1). However, further studies are necessary to reach a more comprehensive and precise understanding of the distribution of benthic debris on the seafloor below the KE system.

In conclusion, we provide insights into the density, distribution and composition of deep seafloor plastic debris (macroplastics) on the abyssal plain beneath the KE/KERG, off Japan. These data confirm the view that the debris problem in the marine environment is serious even in the abyssal zone: benthic plastics are ubiquitous in the abyssal plain. Despite earlier studies having documented relatively low densities of debris on the abyssal plain seafloor<sup>14</sup>, our results highlight the high abundance of macroplastic debris on the abyssal deep seafloor beneath the KE system. We suggest that the seafloor beneath the KE, which expands across the North Pacific (140-160°E) is an important sink for plastic debris. The Kuroshio current is one of the major oceanic currents which carries massive amounts of plastic debris sourced from Asian continent to the North Pacific<sup>17</sup>, and transports floating macro-debris into the deep waters beneath the KE/KERG. Investigations into the seafloor beneath the KE and associated recirculation gyre is necessary to our understanding of the volume, density and sources of plastics that accumulate in the deep basin. This would also greatly contribute towards locating the missing plastics that ends up in the deep-sea<sup>36-38</sup>.

## Materials and Methods

### Study location

The study was conducted on the seafloor underneath the Kuroshio Extension (KE), the KE recirculation gyre (KERG), and the main current of Kuroshio, during a research cruise aboard the R/V *Yokosuka* (YK-1911) in August-September 2019 (Fig. 1).

The observation of benthic plastic debris on the seafloor was conducted at one site under the KE (St. 10, depth 5700 m), two sites in the KERG (St. 8 and 9, depth 5800 m), and one site under the main current of Kuroshio at the Myojin Knoll (St. 6.5, depth 1,500 m) located on the Izu-Ogasawara ridge (Table 1). For comparison, we also took observations at Sagami Bay (St. 2, depth 1,400 m), a bay close to a highly populated region off the coast of Japan that includes Tokyo.

323

324 Video observation and sample collection

325

326 Seafloor observations were carried out using JAMSTEC's human occupied vehicle  
327 (HOV) *Shinkai 6500*. During HOV operations, video data was recorded with a  
328 forward-facing full HD fixed video camera (ME20F-SH, Canon), which consisted of a 35  
329 mm full frame CMOS sensor with an equivalent sensitivity in excess of ISO 4 million,  
330 allowing to shoot even in extreme low light conditions below 0.0005 lux. A  
331 downward-looking 4K video camera (Handycam FDA-AX100, Sony), which recorded  
332 the seabed vertically below the HOV was also employed as a supplementary recording.

333

334 The surveys were conducted at an altitude of  $1.02 \pm 0.12$  m (the average distance between  
335 the underside of the vehicle and the bottom substrate during the imaging for each dive)  
336 and vehicle speed of ca. 0.1 m/s. Positional data of the HOV were obtained from the  
337 Super-Short Baseline (SSBL) navigation transponder and were continuously recorded  
338 during the dives.

339

340 During the observations, collections of debris were carried out whenever possible using  
341 either manipulators or a suction sampler. Retrieved plastic debris were photographed on  
342 board and a portion of the debris was sub-sampled for further polymer type analysis.

343

344 Analysis of video data

345

346 Videos from the full HD and 4K camera were played on shore and observations of debris  
347 were recorded. Each item of debris was classified into three categories: plastic, metal and  
348 wood (both natural and processed). All items which could easily be identified as debris  
349 were labeled as such, and those where an initial identification was not possible were  
350 labeled as potential debris items. These potential debris items were further evaluated  
351 several times by the authors until a consensus was reached. In cases where a consensus  
352 could not be reached between authors the item was not considered to be debris <sup>32</sup>.

353

354 The areas observed (km<sup>2</sup>) for each dive were estimated from the horizontal distance (km)  
355 of the video observation and the width of the video image (m). The horizontal distance of  
356 the video observation was estimated by summing the distance calculated from the latitude  
357 and longitude for every 10-second interval of each dive. The width of the video image  
358 was estimated using the distance from the sea bottom to the fixed camera, the angle of the

359 vehicle against the sea bottom, and the camera's aperture angle<sup>39</sup>. Then, the densities of  
360 debris (number of items km<sup>-2</sup>) were estimated.

361

362 Analysis of the retrieved samples

363

364 The sub-samples of the retrieved plastic debris were soaked in 30% H<sub>2</sub>O<sub>2</sub> overnight to  
365 remove organic matter before the polymer type of plastic was analyzed using a Fourier  
366 transform infrared spectroscopy with an attenuated total reflection (ATR-FTIR, Nicolet  
367 iS5, Thermo Fisher Scientific). A hit quality >70% was used as the threshold for polymer  
368 types<sup>40</sup>.

369

370 Particle-tracking simulation

371

372 In order to examine the behavior of the debris from the subsurface water to the seafloor,  
373 and their behavior once they are on the seafloor, particle-tracking simulation experiments  
374 were carried out by utilizing the integrating three-dimensional monthly velocity field of  
375 ESTOC (Estimated State of Global Ocean for Climate Research)<sup>41</sup>. Full details of  
376 ESTOC are given in the supplemental information. For the simulations, particles were  
377 placed at the surface (5 m depth of model grid) in a specific region with a start date of  
378 September 1. A total of 10 particles were placed within one model grid for each specified  
379 region. The integrated time-step was set to 24 hours. The monthly velocity field is  
380 interpolated in time to be consistent with the integrated time-step. The integration period  
381 was set to a maximum of 5 years which constitutes 5 cycles of the same monthly time  
382 development. In addition to the vertical velocity values within ESTOC, a specific sinking  
383 velocity which was experimentally obtained in the laboratory was artificially given (see  
384 supplementary information and Table S3 for details). Subgrid-scale horizontal diffusion  
385 was expressed as a random walk of  $1.2 \times 10^4$  m per day. Particles reached to land or  
386 bottom, were replaced by adjacent model ocean grids and released again, which means  
387 that the number of tracking particles were kept during the simulation period. The  
388 particle-tracking simulation experiments were performed for St. 6.5, 8 and 10.

389

### 390 Acknowledgments

391

392 The authors thank the Captain and the crew of the R/V *Yokosuka* and the *Shinkai* team  
393 for their efforts to make the sampling possible. We also thank M. Morioka (Marine

394 Work Japan. Co Ltd.) for technical help during the cruise and T. Morotomi for help in  
395 video analysis.

396

397 Author contributions

398

399 R.N., M.T. designed and S.C., K.F. oversaw the study, R.N., A.Y., T.K., Y.N., T.I., N.I.,  
400 H.N., H.R., K.O., K.K., M.S., T.Ya., T.Yo. performed the sampling and experiments,  
401 R.N. analyzed the data, S.M., S.O. developed the model, R.N., S.M. wrote the  
402 manuscript, R.N., S.M., S.O. prepared figures and tables, K.I. contributed  
403 materials/analysis tools. All authors reviewed the manuscript.

404

## 405 **Compliance with Ethical Standards**

406

407 The location for this study was within the EEZ of Japan and not privately owned or  
408 protected in any way. No specific permits were required for the described field studies  
409 and sample collection. The field studies did not involve any endangered or protected  
410 species.

411

## 412 **Funding**

413

414 This study was partially funded by JSPS KAKENHI grant number 19H04262 and the  
415 New Energy and Industrial Technology Development Organization (NEDO) project  
416 number 19101211-0.

417

## 418 **Conflict of Interest**

419

420 The authors declare that they have no conflict of interest.

421

# References

1. Jambeck, J. R. *et al.* Plastic waste inputs from land into the ocean. *Science*. **347**, 768–771 (2015).
2. Derraik, J. G. B. The pollution of the marine environment by plastic debris: a review. *Mar. Pollut. Bull.* **44**, 842–852 (2002).
3. C  zar, A. *et al.* Plastic debris in the open ocean. *Proc. Natl. Acad. Sci.* **111**, 10239–10244 (2014).
4. Eriksen, M. *et al.* Plastic pollution in the world’s oceans: more than 5 trillion plastic pieces weighing over 250,000 tons afloat at sea. *PLoS One* **9**, e111913 (2014).
5. Van Sebille, E. *et al.* A global inventory of small floating plastic debris. *Environ. Res. Lett.* **10**, 124006 (2015).
6. Egger, M., Sulu-Gambari, F. & Lebreton, L. first evidence of plastic fallout from the North Pacific Garbage Patch. *Sci. Rep.* **10**, 1–10 (2020).
7. Michels, J., Stippkugel, A., Lenz, M., Wirtz, K. & Engel, A. Rapid aggregation of biofilm-covered microplastics with marine biogenic particles. *Proc. R. Soc. B* **285**, 20181203 (2018).
8. Woodall, L. C. *et al.* The deep sea is a major sink for microplastic debris. *R. Soc. open Sci.* **1**, 140317 (2014).
9. Woodall, L. C., Robinson, L. F., Rogers, A. D., Narayanaswamy, B. E. & Paterson, G. L. J. Deep-sea litter: a comparison of seamounts, banks and a ridge in the Atlantic and Indian Oceans reveals both environmental and anthropogenic factors impact accumulation and composition. *Front. Mar. Sci.* **2**, 3 (2015).
10. Sverdrup, H. U., Johnson, M. W. & Fleming, R. H. *The Oceans: Their physics, chemistry, and general biology*. **7**, (Prentice-Hall New York, 1942).
11. Thistle, D. The deep-seafloor: an overview. in *Ecosystems of the deep oceans* (ed. Tyler, P. A.) **28**, 5–37 (Elsevier Science, 2003).
12. Pham, C. K. *et al.* Marine litter distribution and density in European seas, from the shelves to deep basins. *PLoS One* **9**, e95839 (2014).
13. Tubau, X. *et al.* Marine litter on the floor of deep submarine canyons of the Northwestern Mediterranean Sea: the role of hydrodynamic processes. *Prog. Oceanogr.* **134**, 379–403 (2015).
14. Chiba, S. *et al.* Human footprint in the abyss: 30 year records of deep-sea plastic debris. *Mar. Policy* **96**, 204–212 (2018).

- 457 15. UNESCO. *Global Open Oceans and Deep Seabed (GOODS) biogeographic*  
458 *classification. UNESCO-IOC* (2009).
- 459 16. Yamashita, R. & Tanimura, A. Floating plastic in the Kuroshio current area,  
460 western North Pacific Ocean. *Mar. Pollut. Bull.* **4**, 485–488 (2007).
- 461 17. Isobe, A., Uchida, K., Tokai, T. & Iwasaki, S. East Asian seas: a hot spot of  
462 pelagic microplastics. *Mar. Pollut. Bull.* **101**, 618–623 (2015).
- 463 18. Lebreton, L. *et al.* Evidence that the Great Pacific Garbage Patch is rapidly  
464 accumulating plastic. *Sci. Rep.* **8**, 1–15 (2018).
- 465 19. Wyrski, K., Magaard, L. & Hager, J. Eddy energy in the oceans. *J. Geophys. Res.*  
466 **81**, 2641–2646 (1976).
- 467 20. Qiu, B. & Chen, S. Eddy-mean flow interaction in the decadal modulating  
468 Kuroshio Extension system. *Deep Sea Res. Part II Top. Stud. Oceanogr.* **57**,  
469 1098–1110 (2010).
- 470 21. Van Sebille, E. *et al.* The physical oceanography of the transport of floating  
471 marine debris. *Environ. Res. Lett.* **15**, 23003 (2020).
- 472 22. Brach, L. *et al.* Anticyclonic eddies increase accumulation of microplastic in the  
473 North Atlantic subtropical gyre. *Mar. Pollut. Bull.* **126**, 191–196 (2018).
- 474 23. Howell, E. A., Bograd, S. J., Morishige, C., Seki, M. P. & Polovina, J. J. On  
475 North Pacific circulation and associated marine debris concentration. *Mar. Pollut.*  
476 *Bull.* **65**, 16–22 (2012).
- 477 24. Ramirez-Llodra, E., De Mol, B., Company, J. B., Coll, M. & Sardà, F. Effects of  
478 natural and anthropogenic processes in the distribution of marine litter in the  
479 deep Mediterranean Sea. *Prog. Oceanogr.* **118**, 273–287 (2013).
- 480 25. Amon, D. J. *et al.* Deep-Sea Debris in the Central and Western Pacific Ocean.  
481 *Front. Mar. Sci.* (2020).
- 482 26. Angiolillo, M. *et al.* Distribution and assessment of marine debris in the deep  
483 Tyrrhenian Sea (NW Mediterranean Sea, Italy). *Mar. Pollut. Bull.* **92**, 149–159  
484 (2015).
- 485 27. Cau, A. *et al.* Submarine canyons along the upper Sardinian slope (Central  
486 Western Mediterranean) as repositories for derelict fishing gears. *Mar. Pollut.*  
487 *Bull.* **123**, 357–364 (2017).
- 488 28. Ioakeimidis, C., Galgani, F. & Papatheodorou, G. Occurrence of marine litter in  
489 the marine environment: a world panorama of floating and seafloor plastics. in  
490 *Hazardous Chemicals Associated with Plastics in the Marine Environment*  
491 93–120 (Springer, 2019).

- 492 29. Mordecai, G., Tyler, P. A., Masson, D. G. & Huvenne, V. A. I. Litter in  
493 submarine canyons off the west coast of Portugal. *Deep Sea Res. Part II Top.*  
494 *Stud. Oceanogr.* **58**, 2489–2496 (2011).
- 495 30. Watters, D. L., Yoklavich, M. M., Love, M. S. & Schroeder, D. M. Assessing  
496 marine debris in deep seafloor habitats off California. *Mar. Pollut. Bull.* **60**,  
497 131–138 (2010).
- 498 31. Shimanaga, M. & Yanagi, K. The Ryukyu Trench may function as a “depocenter”  
499 for anthropogenic marine litter. *J. Oceanogr.* **72**, 895–903 (2016).
- 500 32. Tekman, M. B., Krumpen, T. & Bergmann, M. Marine litter on deep Arctic  
501 seafloor continues to increase and spreads to the North at the HAUSGARTEN  
502 observatory. *Deep sea Res. part I Oceanogr. Res. Pap.* **120**, 88–99 (2017).
- 503 33. Andrady, A. L. Environmental degradation of plastics under land and marine  
504 exposure conditions. in *Proceedings of the 2nd International Conference on*  
505 *Marine Debris* (eds. Shomura, R. S. & Godfrey, M. L.) (1990).
- 506 34. Debrot, A. O., Vinke, E., Van der Wende, G., Hylkema, A. & Reed, J. K.  
507 Deepwater marine litter densities and composition from submersible  
508 video-transects around the ABC-islands, Dutch Caribbean. *Mar. Pollut. Bull.* **88**,  
509 361–365 (2014).
- 510 35. Kitamura, T., Nakano, T. & Sugimoto, S. Decadal variations in mixed layer  
511 salinity in the Kuroshio Extension recirculation gyre region: influence of  
512 precipitation during the warm season. *J. Oceanogr.* **72**, 167–175 (2016).
- 513 36. Thompson, R. C. *et al.* Lost at sea: where is all the plastic? *Science.* **304**, 838  
514 (2004).
- 515 37. Choy, C. A. *et al.* The vertical distribution and biological transport of marine  
516 microplastics across the epipelagic and mesopelagic water column. *Sci. Rep.* **9**,  
517 1–9 (2019).
- 518 38. Koelmans, A. A., Kooi, M., Law, K. L. & van Sebille, E. All is not lost: deriving  
519 a top-down mass budget of plastic at sea. *Environ. Res. Lett.* **12**, 114028 (2017).
- 520 39. Nakajima, R. *et al.* A new method for estimating the area of the seafloor from  
521 oblique images taken by deep-sea submersible survey platforms. *JAMSTEC Rep.*  
522 *Res. Dev.* **19**, 59–66 (2014).
- 523 40. Galgani, F. *et al.* *Guidance on monitoring of marine litter in European seas.*  
524 (Publications Office of the European Union, 2013). doi:10.2788/99475
- 525 41. Osafune, S., Masuda, S., Sugiura, N. & Doi, T. Evaluation of the applicability of  
526 the Estimated State of the Global Ocean for Climate Research (ESTOC) data set.  
527 *Geophys. Res. Lett.* **42**, 4903–4911 (2015).



528

## 529 **Tables**

530

### 531 **Table 1.**

532 Details of the study sites.

| Site    | Latitude (N) | Longitude (E) | Depth (m) | Dive number | Dive date (dd/mm/yy) | Area observed (m <sup>2</sup> ) |
|---------|--------------|---------------|-----------|-------------|----------------------|---------------------------------|
| St. 2   | 35°1.25'     | 139°22.65'    | 1400      | 1558        | 12/09/2019           | 2564.5                          |
| St. 6.5 | 32°06.2'     | 139°52.0'     | 1500      | 1556        | 05/09/2019           | 3136.0                          |
| St. 8   | 33°00.0'     | 145°00.0'     | 5718      | 1553        | 31/08/2019           | 1281.9                          |
| St. 9   | 34°45.0'     | 145°00.0'     | 5813      | 1554        | 01/09/2019           | 4653.7                          |
| St. 10  | 35°55.61'    | 144°57.87'    | 5707      | 1554        | 02/09/2019           | 6205.8                          |

533

534

535

# Figure Captions

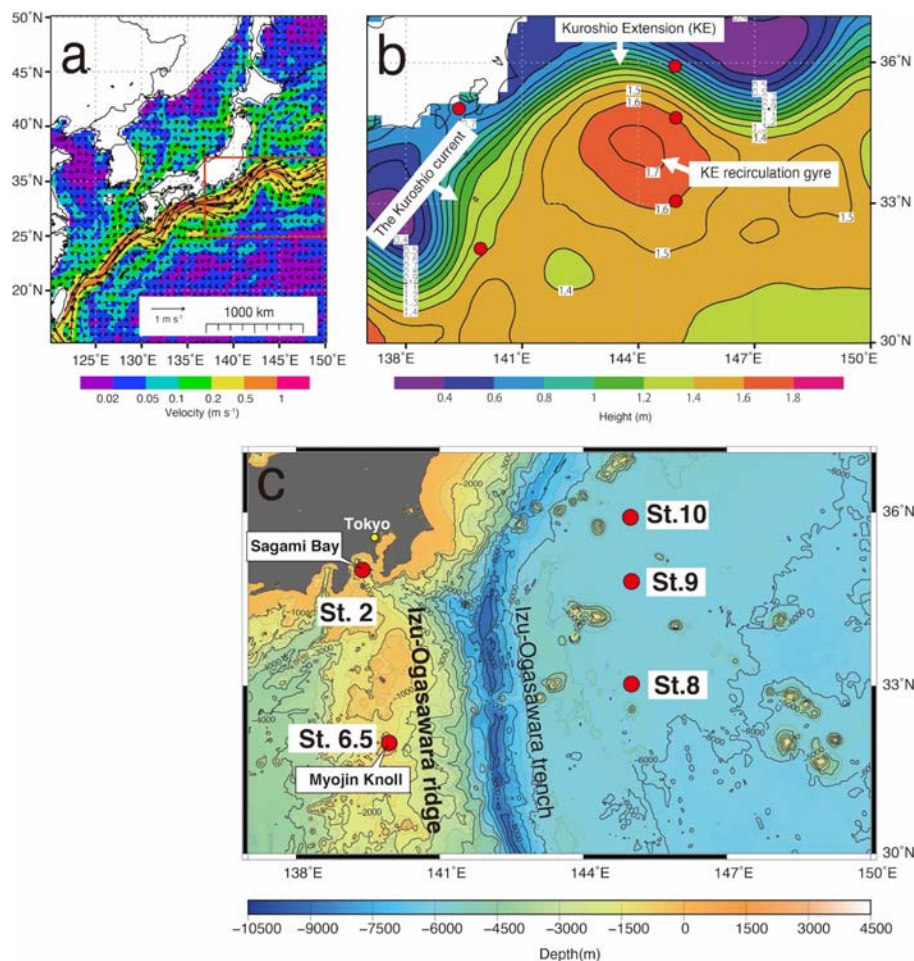

**Figure 1.** Maps of the study area. (a) The Kuroshio current and the Japanese archipelago. Color denotes current velocity ( $\text{m s}^{-1}$ ). (b) The Kuroshio current, Kuroshio Extension (KE) and associated recirculation gyre of the study site. Color contours indicate averaged sea surface height (m) in 2018. Red circles donate the sampling sites. (c) Sea floor map of the sampling sites. St. 2: Sagami Bay (depth 1400 m), St. 6.5: Myojin Knoll on the Izu-Ogasawara ridge (1500 m), Sts. 8 and 9: Kuroshio Extension recirculation gyre (KERG) (5718-5813 m), and St. 10: Kuroshio Extension (KE) (5707 m). (a) and (b) were generated using E.U. Copernicus Marine Service Information. (c) was generated using ETOPO11 Arc-Minute Global Relief Model, National Geophysical Data Center, NOAA. doi: 10.7289/V5C8276M.

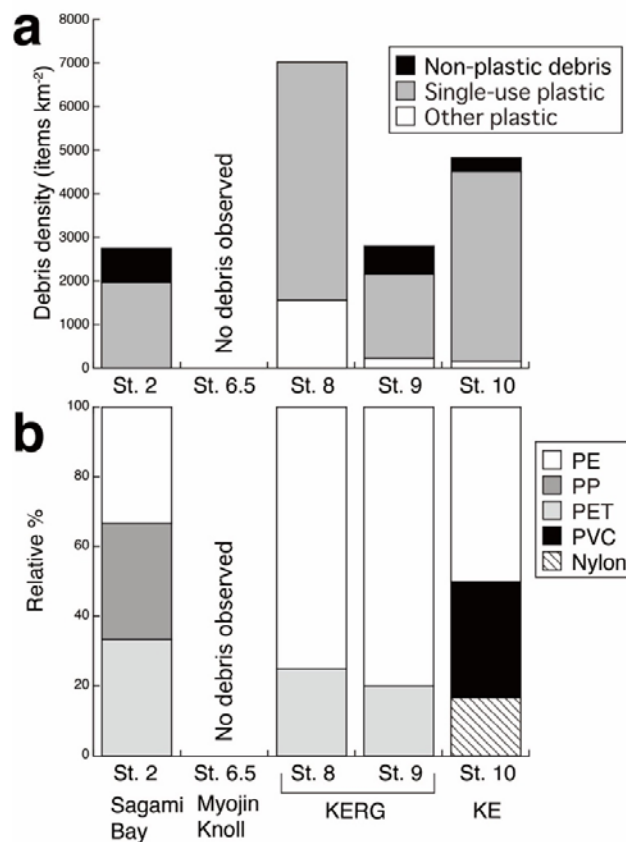

**Figure 2.** Density and composition of marine debris on the deep seafloors off Japan. (a) Debris density (number of items/km<sup>2</sup>) and composition at each site. (b) Relative composition of plastic type at each site. KE: Kuroshio Extension, KERG: KE recirculation gyre.

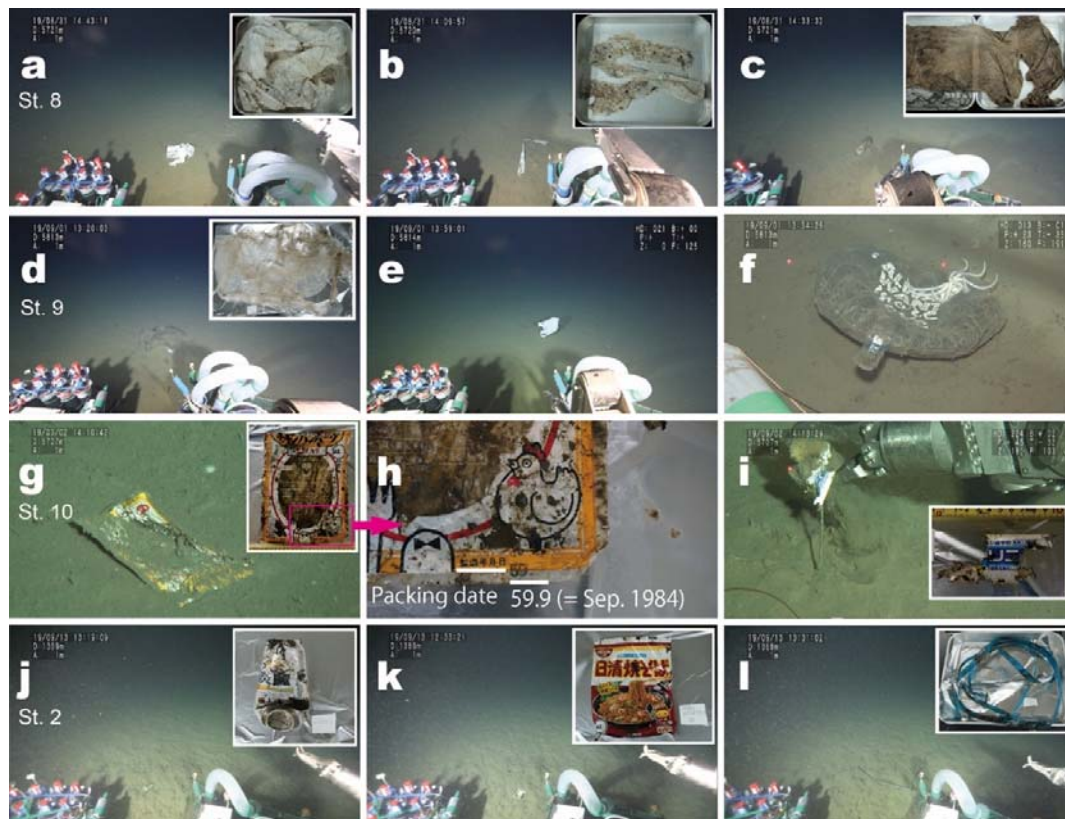

**Figure 3.** Examples of the types of plastic debris observed during the study. St. 8: (a) plastic bag, (b) plastic bag, and (c) cloth which was entangled by net-like debris. St. 9: (d) plastic bag, (e) plastic bag, and (f) balloon debris with a brittle star says "I ALWAYS WANT more love". St. 10: (g) package for chicken steak and (h) the manufacture date is September 1984. "59" means 1984 in Japanese era (St. 10), and (i) toothpaste tube. St. 2: (j) beer can, (k) package for noodle, and (l) packaging strap.

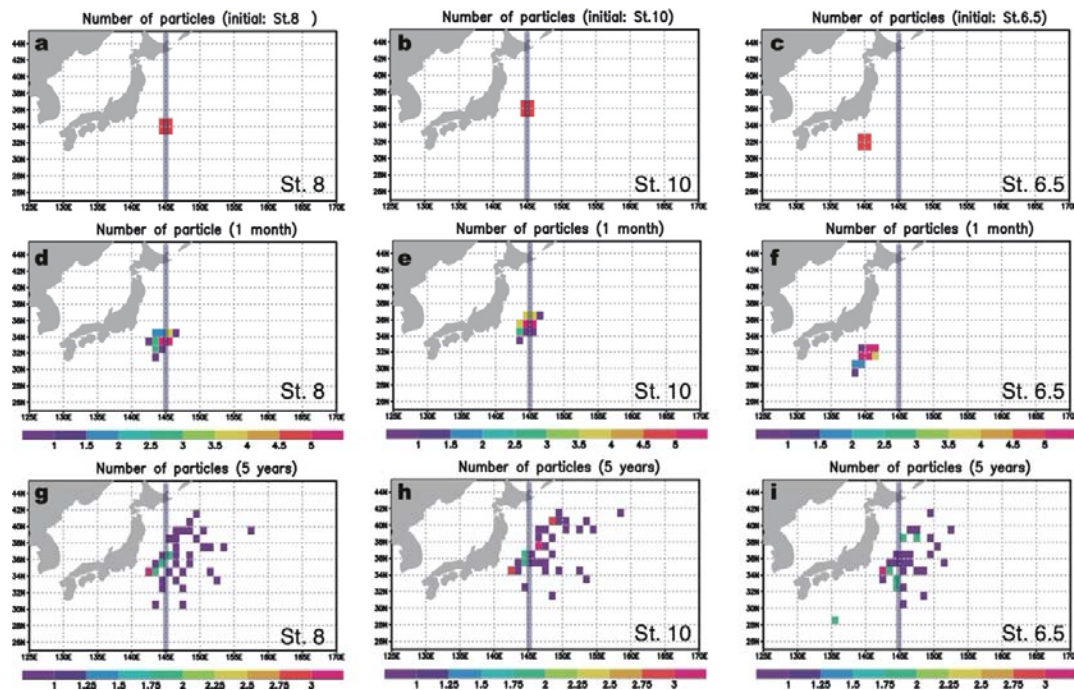

**Figure 4.** Number of particles for particle tracking experiment. (a-c) Initial placements of particles on the sea surface at Sts. 6.5, 8 and 10. (d-f) the calculated distribution after 1 month for each site. (g-i) those for after 5 years. Bold vertical lines indicate 145°E.

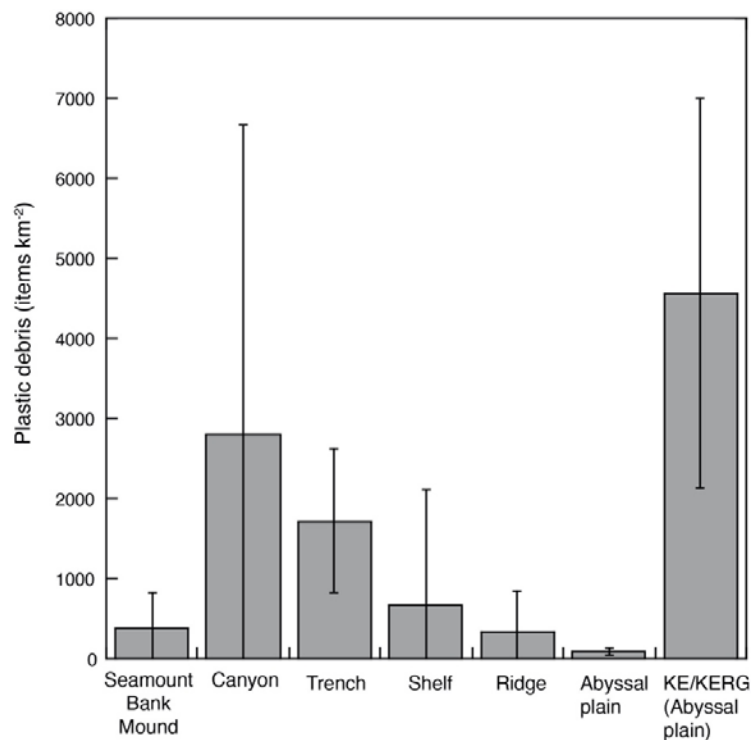

575

576 Figure 5. Worldwide average densities (items/km<sup>2</sup>) of plastic debris per seafloor  
577 morphology. The plastic density includes both macroplastics and fishing gears as most  
578 of fishing gear is made of plastic. See Supplementary Table S2 for numerical values.  
579 KE: Kuroshio Extension, KERG: KE recirculation gyre.

580

581
